# Supplementary material for: Upregulation of Human ST8Sia VI (α2,8-Sialyltransferase) Gene Expression by Physcion in SK-N-BE(2)-C Human Neuroblastoma Cells
Source: PubMed Central journal article supplement (PMC5000644; doi:10.3390/ijms17081246), 2016-08-02
Supplement: ijms-17-01246-s001.pdf [file ijms-17-01246-s001.pdf]

## Supplementary Materials: Upregulation of Human ST8Sia VI ( $\alpha$ 2,8-Sialyltransferase) Gene Expression by Phycion in SK-N-BE(2)-C Human Neuroblastoma Cells

Hyun-Kyoung Yoon, Hyun-Kyu An, Min Jung Ko, Kyoung-Sook Kim, Seo-Won Mun, Dong-Hyun Kim, Cheol Min Kim, Cheorl-Ho Kim, Young Whan Choi and Young-Choon Lee

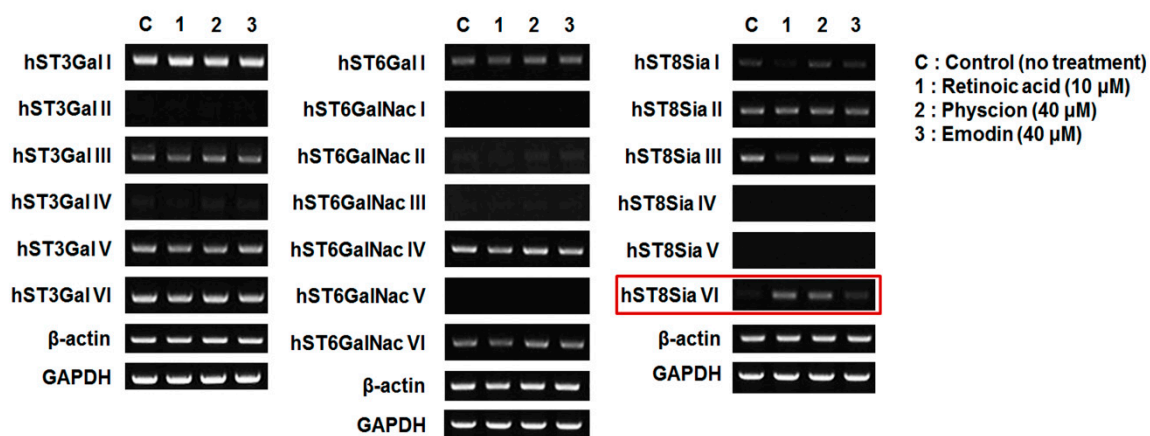

**Figure S1.** Effects of phycion on gene expression of human sialyltransferases in SK-N-BE(2)-C cells. SK-N-BE(2)-C cells were treated with retinoic acid (10  $\mu$ M), phycion (40  $\mu$ M), and emodin (40  $\mu$ M) for 24 h. mRNA transcripts of human sialyltransferase were detected by RT-PCR. As the internal controls, parallel reactions were performed to measure levels of GAPDH and  $\beta$ -actin.

**Table S1.** Primer sequences used for reverse transcription-polymerase chain reaction (RT-PCR) of nineteen human sialyltransferase genes.

| Primer         | Sequence                           | Strand    | Size (bp) |
|----------------|------------------------------------|-----------|-----------|
| hST3Gal I      | 5'-CTGAAAGTGCTCACCTTCCTCGTGC-3'    | Sense     |           |
| hST3Gal I      | 5'-ACAGCTCCTTGATGGTGTCAATTCAA-3'   | Antisense | 337       |
| hST3Gal II     | 5'-TACCTGGACTCAGGGGCCCTGGATG-3'    | Sense     |           |
| hST3Gal II     | 5'-GGCACTGGTGGGGTCCCGGAA-3'        | Antisense | 343       |
| hST3Gal III    | 5'-GTATGATCGGTTGGGCTTC-3'          | Sense     |           |
| hST3Gal III    | 5'-CGCTCGTACTGCTCAGG-3'            | Antisense | 520       |
| hST3Gal IV     | 5'-GCTTTCACCTCTGTGCAG-3'           | Sense     |           |
| hST3Gal IV     | 5'-CTTGTTGATGGCATCTCCC-3'          | Antisense | 240       |
| hST3Gal V      | 5'-CCCTGCCATTCTGGGTACGAC-3'        | Sense     |           |
| hST3Gal V      | 5'-CACGATCAATGCCTCCACTGAGATC-3'    | Antisense | 413       |
| hST3Gal VI     | 5'-TTGGGAGAAGGACAACCTTC-3'         | Sense     |           |
| hST3Gal VI     | 5'-CCAGGCAGCAACAGACAGTA-3'         | Antisense | 630       |
| hST6Gal I      | 5'-TATCGTAAGCTGCACCCCAATC-3'       | Sense     |           |
| hST6Gal I      | 5'-TTAGCAGTGAATGGTCCGGAAG-3'       | Antisense | 372       |
| hST6GalNAc I   | 5'-GCAACCACAGCCAAGACGCTCATTCCC-3'  | Sense     |           |
| hST6GalNAc I   | 5'-TGTCACGACCTTCTGCACCAAGGAGTAG-3' | Antisense | 456       |
| hST6GalNAc II  | 5'-AAGCTGCTACATCCGGACTTCA-3'       | Sense     |           |
| hST6GalNAc II  | 5'-GGGACAGATCGTGGTTTGCATA-3'       | Antisense | 247       |
| hST6GalNAc III | 5'-CTGTGATTGCTGTGAGCTTCATAG-3'     | Sense     |           |
| hST6GalNAc III | 5'-AAGAGGAACGCTGGTATGGGACACA-3'    | Antisense | 380       |
| hST6GalNAc IV  | 5'-CGGCTCGTGCTCATCATCCTGTGCT-3'    | Sense     |           |
| hST6GalNAc IV  | 5'-GTGAGCTGCAGCAGCGTGCGGTAGG-3'    | Antisense | 503       |
| hST6GalNAc V   | 5'-ATGAAGACCCTGATGCGCCATGGTC-3'    | Sense     |           |
| hST6GalNAc V   | 5'-CTTGTGGCGAGTAATCATGAAGGCC-3'    | Antisense | 624       |
| hST6GalNAc VI  | 5'-ATGAGTAGCAACAAAGAGCAGCGGT-3'    | Sense     |           |
| hST6GalNAc VI  | 5'-AACACCAGGCCCGCTCGCTGGATCA-3'    | Antisense | 518       |
| hST8Sia I      | 5'-TGTGGTCCAGAAAGACATTTGTGGACA-3'  | Sense     |           |
| hST8Sia I      | 5'-TGGAGTGAGGTATCTTCACATGGGTCC-3'  | Antisense | 460       |
| hST8Sia II     | 5'-ACCATGAATGTGTCCAGAACCTCTA-3'    | Sense     |           |
| hST8Sia II     | 5'-AGGTAGATTTGTTTGCAGAAACGTGTG-3'  | Antisense | 542       |
| hST8Sia III    | 5'-GCTTGACGGGGCCATTCTTTGG-3'       | Sense     |           |
| hST8Sia III    | 5'-GCTTGGTGAGCCCTTCCCCA-3'         | Antisense | 410       |
| hST8Sia IV     | 5'-GCCACAGAAGACCCCAAGTGA-3'        | Sense     |           |
| hST8Sia IV     | 5'-CACTGACACATCTCGTTCTGCA-3'       | Antisense | 450       |
| hST8Sia V      | 5'-ACCGGGATTGTTGGGGAGCCGA-3'       | Sense     |           |
| hST8Sia V      | 5'-GATGCCACTGGTGTCCACCTCA-3'       | Antisense | 392       |
| hST8Sia VI     | 5'-CCCTATTCTGGAGGACATTGCAACCTA-3'  | Sense     |           |
| hST8Sia VI     | 5'-GTTGGAGGATCTGGCTGTATTCTTTG-3'   | Antisense | 390       |
| β-actin        | 5'-CAAGAGATGGCCACGGCTGCT-3'        | Sense     |           |
| β-actin        | 5'-TCCTTCTGCATCCTGTCGGCA-3'        | Antisense | 247       |
| GAPDH          | 5'-AGCCTCAAGATCATCAGCAATGTCCT-3'   | Sense     |           |
| GAPDH          | 5'-AAATTCGTTGTCATACCAGGAAATGAG-3'  | Antisense | 528       |

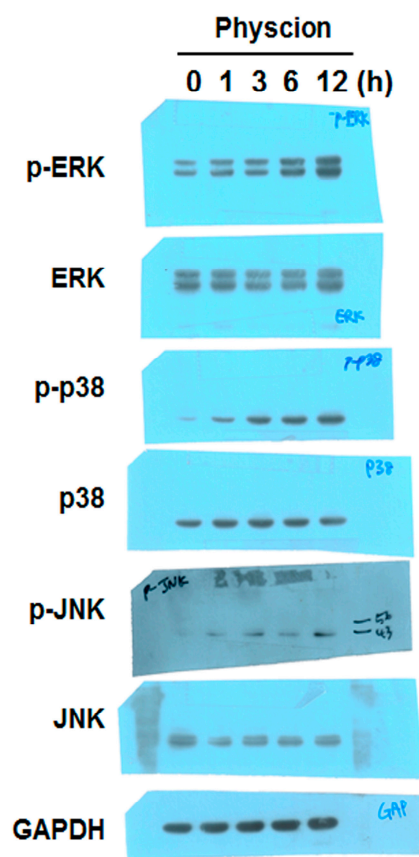

Figure S2. Raw data of Figure 6A.
